# Supplementary material for: Relationship Between Non-Alcoholic Fatty Liver Disease and Degree of Hepatic Steatosis and Bone Mineral Density
Source: PubMed Central journal article supplement (PMC8964007; doi:10.3389/fendo.2022.857110), 2022-03-14
Supplement: Table_1.pdf [file Table_1.pdf]

**Table1:** Weighted characteristics of the study population based on LSM

|                                             | <b>Normal group<br/>(LSM&lt;8.0, n =<br/>1849)</b> | <b>Significant fibrosis<br/>(8.0≤LSM&lt;9.7, n =<br/>59)</b> | <b>Advanced<br/>fibrosis(9.7≤<br/>LSM&lt;13.6, n = 39)</b> | <b>Cirrhosis(LSM<br/>≥13.6, n = 33)</b> | <b>P<br/>value</b> |
|---------------------------------------------|----------------------------------------------------|--------------------------------------------------------------|------------------------------------------------------------|-----------------------------------------|--------------------|
| Age (years)                                 | 38.071 ± 11.880                                    | 40.694 ± 10.733                                              | 44.305 ± 11.047                                            | 43.678 ± 9.037                          | 0.00022            |
| <i>Gender (%)</i>                           |                                                    |                                                              |                                                            |                                         | 0.12895            |
| Male                                        | 49.378                                             | 50.442                                                       | 71.865                                                     | 49.732                                  |                    |
| Female                                      | 50.622                                             | 49.558                                                       | 28.135                                                     | 50.268                                  |                    |
| <i>Race/Ethnicity (%)</i>                   |                                                    |                                                              |                                                            |                                         | 0.52099            |
| Non-Hispanic White                          | 55.658                                             | 67.754                                                       | 51.633                                                     | 69.813                                  |                    |
| Non- Hispanic Black                         | 12.552                                             | 7.963                                                        | 16.857                                                     | 10.863                                  |                    |
| Mexican American                            | 10.426                                             | 6.330                                                        | 10.440                                                     | 5.304                                   |                    |
| Other Race                                  | 21.364                                             | 17.953                                                       | 21.070                                                     | 14.020                                  |                    |
| <i>Diabetes (%)</i>                         |                                                    |                                                              |                                                            |                                         | <0.0000            |
|                                             |                                                    |                                                              |                                                            |                                         | 1                  |
| Yes                                         | 3.730                                              | 15.354                                                       | 26.480                                                     | 10.379                                  |                    |
| No                                          | 96.290                                             | 84.646                                                       | 73.520                                                     | 89.621                                  |                    |
| Broken or fractured a<br>hip                |                                                    |                                                              |                                                            |                                         | 0.97555            |
| Yes                                         | 0.559                                              | 100.000                                                      | 100.000                                                    | 100.000                                 |                    |
| No                                          | 99.441                                             | 0.000                                                        | 0.000                                                      | 0.000                                   |                    |
| Broken or fractured a<br>wrist              |                                                    |                                                              |                                                            |                                         | 0.13142            |
| Yes                                         | 15.354                                             | 3.194                                                        | 100.000                                                    | 100.000                                 |                    |
| No                                          | 84.646                                             | 96.806                                                       | 0.000                                                      | 0.000                                   |                    |
| Broken or fractured<br>spine                |                                                    |                                                              |                                                            |                                         | 0.97887            |
| Yes                                         | 3.361                                              | 1.963                                                        | 7.796                                                      | 100.000                                 |                    |
| No                                          | 96.639                                             | 98.037                                                       | 92.204                                                     | 0.000                                   |                    |
| Ever taken prednisone<br>or cortisone daily |                                                    |                                                              |                                                            |                                         | 0.00646            |
| Yes                                         | 8.257                                              | 100.000                                                      | 100.000                                                    | 41.221                                  |                    |
| No                                          | 91.743                                             | 0.000                                                        | 0.000                                                      | 58.779                                  |                    |
| Income to poverty ratio                     | 3.041 ± 1.635                                      | 2.987 ± 1.658                                                | 3.022 ± 1.674                                              | 3.463 ± 1.516                           | 0.49944            |
| BMI (Kg/m2)                                 | 28.484 ± 6.260                                     | 31.884 ± 9.943                                               | 37.385 ± 7.971                                             | 44.539 ± 9.824                          | <0.0000            |
|                                             |                                                    |                                                              |                                                            |                                         | 1                  |
| Waist circumference<br>(cm)                 | 96.106 ± 15.513                                    | 105.241 ± 22.925                                             | 119.223 ± 18.343                                           | 133.204 ±<br>17.322                     | <0.0000            |
|                                             |                                                    |                                                              |                                                            |                                         | 1                  |
| <i>Laboratory features</i>                  |                                                    |                                                              |                                                            |                                         |                    |
| HbA1c (%)                                   | 5.451 ± 0.725                                      | 6.146 ± 1.539                                                | 5.849 ± 1.052                                              | 5.983 ± 0.968                           | <0.0000            |
|                                             |                                                    |                                                              |                                                            |                                         | 1                  |
| Total cholesterol<br>(mmol/L)               | 4.851 ± 0.958                                      | 4.639 ± 0.946                                                | 4.933 ± 1.119                                              | 5.133 ± 0.840                           | 0.08478            |
| LDL-<br>cholesterol(mmol/L)                 | 2.873 ± 0.862                                      | 2.551 ± 0.818                                                | 2.824 ± 1.057                                              | 3.299 ± 0.482                           | 0.08390            |

**Table1:** Weighted characteristics of the study population based on LSM

|                                                     |                  |                  |                  |                     |              |
|-----------------------------------------------------|------------------|------------------|------------------|---------------------|--------------|
| HDL-<br>cholesterol(mmol/L)                         | 1.384 ± 0.382    | 1.331 ± 0.306    | 1.228 ± 0.517    | 1.113 ± 0.287       | 0.00001      |
| ALT (IU/L)                                          | 22.863 ± 15.991  | 30.302 ± 18.488  | 44.605 ± 41.953  | 30.082 ± 22.422     | <0.0000<br>1 |
| AST (IU/L)                                          | 21.594 ± 10.964  | 25.485 ± 11.856  | 32.412 ± 27.893  | 25.481 ± 17.371     | <0.0000<br>1 |
| ALP(IU/L)                                           | 72.796 ± 21.622  | 86.127 ± 27.940  | 76.253 ± 24.251  | 81.597 ± 24.664     | <0.0000<br>1 |
| GGT (IU/L)                                          | 26.864 ± 26.870  | 32.569 ± 30.892  | 62.605 ± 103.083 | 35.423 ± 37.252     | <0.0000<br>1 |
| Serum iron(umol/L)                                  | 16.328 ± 6.682   | 20.269 ± 14.019  | 17.149 ± 6.324   | 13.617 ± 4.883      | 0.00002      |
| CAP (dB/m)                                          | 251.786 ± 59.452 | 273.758 ± 67.535 | 337.374 ± 58.126 | 354.222 ±<br>49.348 | <0.0000<br>1 |
| LSM (kPa)                                           | 4.731 ± 1.191    | 8.604 ± 0.548    | 11.126 ± 0.973   | 31.758 ± 20.208     | <0.0000<br>1 |
| Lumbar bone mineral<br>density (g/cm <sup>2</sup> ) | 1.050 ± 0.149    | 1.019 ± 0.144    | 1.071 ± 0.151    | 1.116 ± 0.155       | 0.00906      |

---

Mean±SD for continuous variables: P value was calculated by weighted linear regression model.

% for Categorical variables: P value was calculated by weighted chi-square test.
